# Supplementary material
Source: Springer Nature journal article supplement (https://www.springerprofessional.de/resource/supplementary/13638_2014_945_MOESM8_ESM.pdf/11898816)
Supplement: MOESM8 [file 11898816]

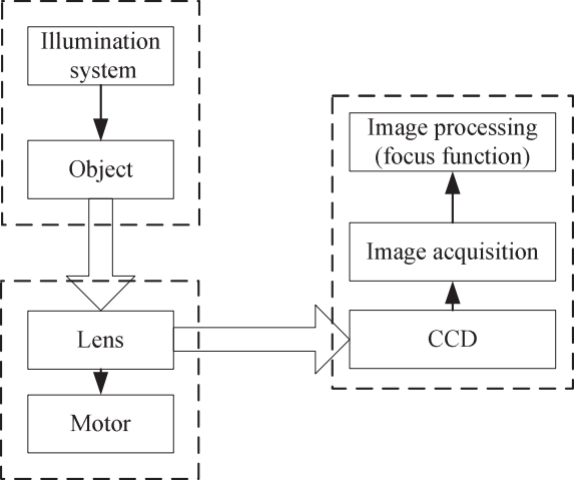

Illumination  
system

Object

Lens

Motor

Image processing  
(focus function)

Image acquisition

CCD
